# Supplementary material for: Interplay of conformational relaxation and hydrogen bond dynamics in the excited states of fluorescent Schiff base anions
Source: Royal Society of Chemistry journal article supplement (doi:10.1039/d2cp05007b), 2022-11-22
Supplement: d2cp05007b1.pdf [file d2cp05007b1.pdf]

## Supporting Information

Interplay of conformational relaxation and hydrogen bond dynamics  
in the excited states of fluorescent Schiff base anions

Souradip Dasgupta, Arkaprava Chowdhury, Dipak Kumar Sahoo,  
Anindya Datta

Department of Chemistry, Indian Institute of Technology Bombay,  
Powai, Mumbai 400 076, India

---

e-mail: [anindya@chem.iitb.ac.in](mailto:anindya@chem.iitb.ac.in) (AD)  
Phone: +91 22 2576 7149, Fax: +91 22 2576 7152

## Table of Contents

| Sr. No. | Content    | Description                                                                                                  | Page    |
|---------|------------|--------------------------------------------------------------------------------------------------------------|---------|
| 1.      | Figure S1  | <sup>1</sup> NMR Spectra of the salbn                                                                        | S1      |
| 2.      | Figure S2  | Steady state spectra of Schiff base anions                                                                   | S2      |
| 3.      | Table ST1  | Photophysical parameters of Schiff base anions                                                               | S3-S4   |
| 4.      | Figure S3  | Quantum yield of Schiff base anions                                                                          | S4      |
| 5.      | Table ST2  | Temporal parameters of Schiff base anions                                                                    | S5-S8   |
| 6.      | Figure S4  | Fluorescence decays (in TCSPC) of Schiff base anions                                                         | S9      |
| 7.      | Figure S5  | Wavelength dependent fluorescence decays of Schiff base anions                                               | S10     |
| 8.      | Figure S6  | Fluorescence decays in TFE                                                                                   | S11     |
| 9.      | Figure S7  | Time Resolved Emission Spectra of Schiff base anions                                                         | S11     |
| 10.     | Figure S8  | Apparent solvent correlation function of Schiff base anions                                                  | S12     |
| 10.     | Table ST3  | Time evolution of apparent solvent correlation function                                                      | S12     |
| 11.     | Figure S9  | Wavelength dependent decays in polar aprotic solvents                                                        | S13     |
| 12.     | Figure S10 | Fluorescence decays of C153 in TFE                                                                           | S13     |
| 13.     | Table ST4  | . Temporal parameters of C153 in 2,2,2-Trifluoroethanol                                                      | S13     |
| 13.     | Figure S11 | Time resolved area normalized emission spectrum of Schiff base anions                                        | S14     |
| 14.     | Table ST5  | Solvent Parameters                                                                                           | S14     |
| 14      | Table ST6  | Time dependent fluorescent Stokes shift of the anions in polar protic solvents                               | S15     |
| 15      | Table ST7  | Coordinates of ground and excited states of salampy <sup>-</sup> obtained from quantum chemical calculations | S16-S17 |

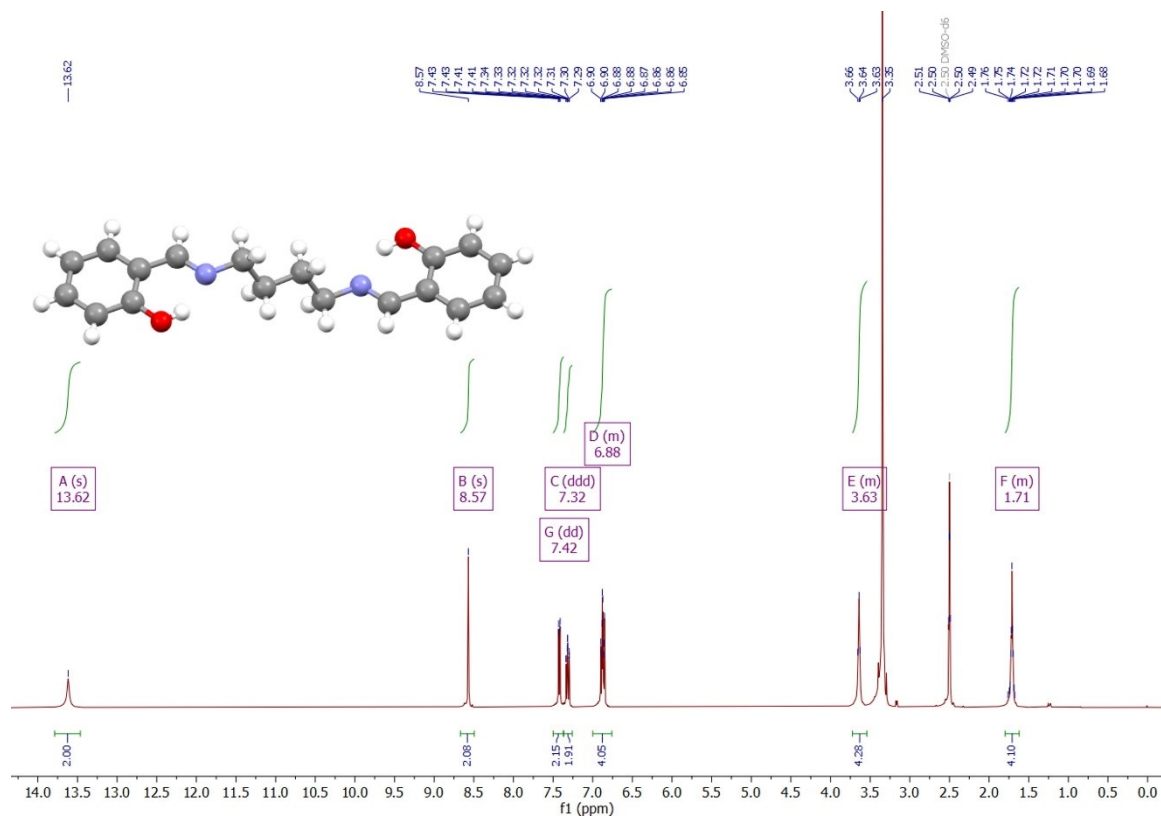

**Figure S1.**  $^1\text{H}$ NMR spectra of salbn in  $\text{DMSO-d}_6$ . Inset- crystal structure.

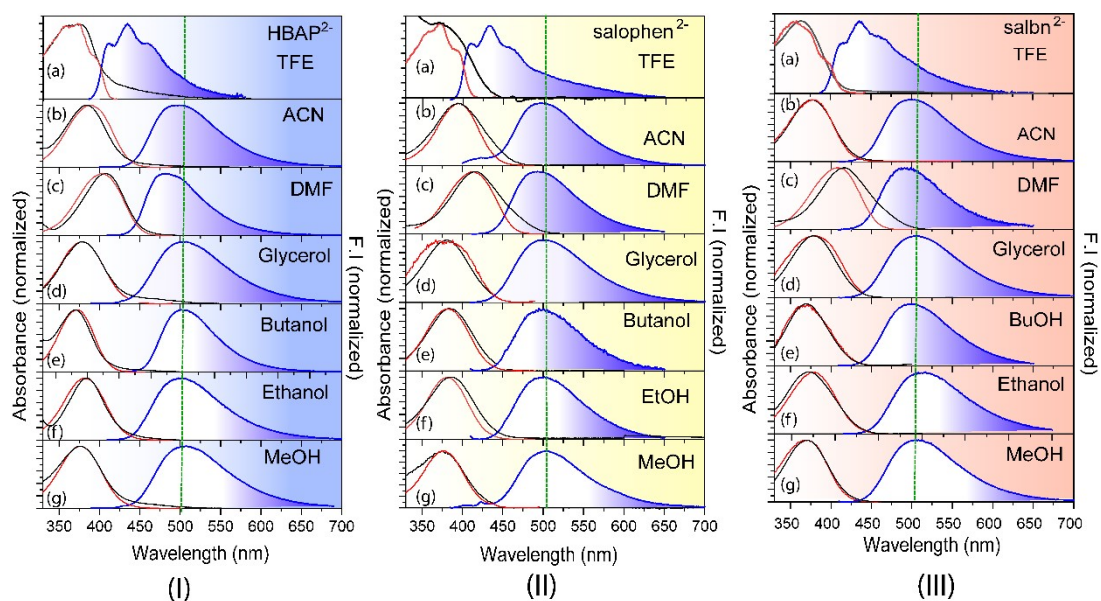

**Figure S2.** Absorption (black), Fluorescence Emission (blue) and excitation (red) of (I) HBAP<sup>2-</sup> (II) salophen<sup>2-</sup> (III) salbn<sup>2-</sup> in (a) TFE (b) ACN (c) DMF (d) Glycerol (e) BuOH (f) EtOH (g) MeOH. Steady state spectra of salophen<sup>2-</sup>, HBAP<sup>2-</sup> in MeOH was found to be same as that reported in our earlier reports. (references 33-35 of the main manuscript)

**Table ST1.** Photophysical parameters of (a) HBAP<sup>2-</sup> (b) salophen<sup>2-</sup> (c) salbn<sup>2-</sup> in different solvents

| <b>(a) HBAP<sup>2-</sup></b>     |            |                                     |                                    |                                     |          |                     |
|----------------------------------|------------|-------------------------------------|------------------------------------|-------------------------------------|----------|---------------------|
| <b>Solvent</b>                   | $\Delta f$ | $\tilde{\nu}_{abs}(\text{cm}^{-1})$ | $\tilde{\nu}_{em}(\text{cm}^{-1})$ | $\Delta\tilde{\nu}(\text{cm}^{-1})$ | $\phi_f$ | $\tau_f(\text{ns})$ |
| <b>Glycerol</b>                  | 0.27       | 26316                               | 19685                              | 6631                                | 0.13     | 1.5                 |
| <b>ACN</b>                       | 0.31       | 25189                               | 20619                              | 4570                                | 0.08     | 3.3                 |
| <b>MeOH</b>                      | 0.31       | 26316                               | 19685                              | 6631                                | 0.03     | 0.9                 |
| <b>Acetone</b>                   | 0.28       | 24691                               | 20619                              | 4072                                | 0.07     | 2.76                |
| <b>DMF</b>                       | 0.27       | 24570                               | 20790                              | 3780                                | 0.07     | 4.2                 |
| <b>EtOH</b>                      | 0.29       | 25974                               | 20000                              | 5974                                | 0.03     | 1.2                 |
| <b>IPA</b>                       | 0.27       | 25840                               | 20080                              | 5760                                | 0.04     | 1.9                 |
| <b>BuOH</b>                      | 0.24       | 26110                               | 20040                              | 6070                                | 0.05     | 2.0                 |
| <b>TFE</b>                       | 0.57       | 26667                               | 23041                              | 3626                                | 0.005    | -                   |
| <b>(b) salophen<sup>2-</sup></b> |            |                                     |                                    |                                     |          |                     |
| <b>Glycerol</b>                  | 0.27       | 26042                               | 19493                              | 6549                                | 0.15     | 1.4                 |
| <b>ACN</b>                       | 0.31       | 25381                               | 20833                              | 4548                                | 0.07     | 3.2                 |
| <b>MeOH</b>                      | 0.31       | 25316                               | 19493                              | 5823                                | 0.01     | 0.9                 |
| <b>Acetone</b>                   | 0.28       | 24691                               | 20534                              | 4157                                | 0.073    | 3.0                 |
| <b>DMF</b>                       | 0.27       | 24631                               | 20790                              | 3841                                | 0.077    | 4.1                 |
| <b>EtOH</b>                      | 0.29       | 25381                               | 19763                              | 5618                                | 0.02     | 1.4                 |
| <b>IPA</b>                       | 0.27       | 25575                               | 20040                              | 5535                                | 0.05     | 2.4                 |
| <b>BuOH</b>                      | 0.24       | 26110                               | 19881                              | 6229                                | 0.05     | 2.1                 |
| <b>TFE</b>                       | 0.57       | 26738                               | 22989                              | 3749                                | 0.003    | -                   |
| <b>(c) salbn<sup>2-</sup></b>    |            |                                     |                                    |                                     |          |                     |
| <b>Glycerol</b>                  | 0.27       | 26247                               | 19608                              | 6639                                | 0.15     | 2.1                 |
| <b>ACN</b>                       | 0.31       | 25126                               | 20704                              | 4422                                | 0.10     | 3.8                 |
| <b>MeOH</b>                      | 0.31       | 25510                               | 19569                              | 5941                                | 0.06     | 0.9                 |
| <b>Acetone</b>                   | 0.28       | 24814                               | 20492                              | 4322                                | 0.09     | 3.5                 |
| <b>DMF</b>                       | 0.27       | 24691                               | 20747                              | 3944                                | 0.09     | 3.9                 |
| <b>EtOH</b>                      | 0.29       | 25840                               | 20000                              | 5840                                | 0.06     | 1.8                 |
| <b>IPA</b>                       | 0.27       | 25707                               | 19920                              | 5787                                | 0.07     | 2.3                 |
| <b>BuOH</b>                      | 0.24       | 26316                               | 20202                              | 6114                                | 0.08     | 2.4                 |
| <b>TFE</b>                       | 0.57       | 27778                               | 23095                              | 4683                                | 0.001    | -                   |

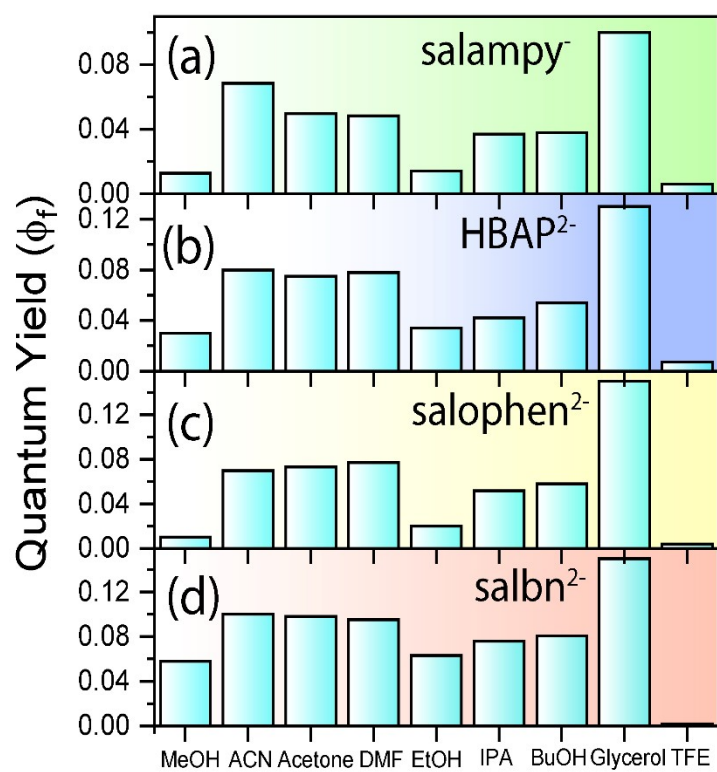

**Figure S3.** Quantum yields ( $\phi_f$ ) of (a) salampy<sup>-</sup> (b) HBAP<sup>2-</sup> (c) salophen<sup>2-</sup> (d) salbn<sup>2-</sup> in different solvents.

**Table ST2.** Temporal parameters of salampy<sup>-</sup>, HBAP<sup>2-</sup>, salophen<sup>2-</sup>, salbn<sup>2-</sup> in different solvents at different wavelengths

| <b>(a) salampy<sup>-</sup></b> |                                    |                                             |
|--------------------------------|------------------------------------|---------------------------------------------|
| <b>Solvent</b>                 | $\lambda_{ex} / \lambda_{em}$ (nm) | $\tau$ (ns) <sup>a</sup>                    |
| <b>EtOH</b>                    | 400/500                            | 1.0 (1.0)                                   |
| <b>Glycerol</b>                | 400/500                            | 1.3 (1.0)                                   |
| <b>ACN</b>                     | 400/490                            | 3.3 (1.0)                                   |
|                                | $\lambda_{ex} / \lambda_{em}$ (nm) | $\tau$ (ns) <sup>a</sup>                    |
| <b>Glycerol</b>                | 400/450                            | 0.40 (0.33)<br>1.23 (0.67)                  |
|                                | 400/600                            | 0.80 (-0.2)<br>1.38 (1.2)                   |
|                                | $\lambda_{ex} / \lambda_{em}$ (nm) | $\tau$ (ps) <sup>a</sup>                    |
| <b>EtOH</b>                    | 400/450                            | 11.33 (0.41)<br>76.8 (0.34)<br>1250 (0.235) |
|                                | 400/600                            | 27.96 (-0.69)<br>1350 (1.69)                |
| <b>BuOH</b>                    | 400/450                            | 8.18 (0.35)<br>60.18(0.38)<br>678.17 (0.27) |
|                                | 400/600                            | 128 (-2.03)<br>270 (0.81)<br>1800 (2.21)    |
| <b>ACN</b>                     | 400/450                            | 5 (0.70)<br>1200 (0.3)                      |
|                                | 400/600                            | 5.1 (0.67)<br>1200 (0.33)                   |
| <b>TFE</b>                     | 400/450                            | 1.0(0.41)<br>8.3(0.13)<br>97.81(0.46)       |
|                                | 400/600                            | 1.3(0.34)<br>7.7(0.12)                      |

|                              |                               |             | 121.7(0.64)                                  |
|------------------------------|-------------------------------|-------------|----------------------------------------------|
| <b>(b) HBAP<sup>2-</sup></b> |                               |             |                                              |
| <b>Solvent</b>               | $\lambda_{ex} / \lambda_{em}$ | <b>(nm)</b> | $\tau$ <b>(ns)<sup>a</sup></b>               |
| <b>EtOH</b>                  | 400/500                       |             | 1.2 (1.0)                                    |
| <b>Glycerol</b>              | 400/500                       |             | 1.5 (1.0)                                    |
| <b>ACN</b>                   | 400/490                       |             | 3.3 (1.0)                                    |
|                              | $\lambda_{ex} / \lambda_{em}$ | <b>(nm)</b> | $\tau$ <b>(ns)<sup>a</sup></b>               |
| <b>Glycerol</b>              | 400/450                       |             | 0.60 (0.4)<br>1.1 (0.6)                      |
|                              | 400/600                       |             | 0.70 (-0.18)<br>1.4 (1.18)                   |
|                              | $\lambda_{ex} / \lambda_{em}$ | <b>(nm)</b> | $\tau$ <b>(ps)<sup>a</sup></b>               |
| <b>EtOH</b>                  | 400/450                       |             | 8.25 (0.33)<br>50.75 (0.41)<br>980 (0.36)    |
|                              | 400/600                       |             | 50.51 (-0.35)<br>1300 (1.35)                 |
| <b>BuOH</b>                  | 400/450                       |             | 5.04 (0.35)<br>37.65 (0.46)<br>971.46 (0.17) |
|                              | 400/600                       |             | 135 (-1.25)<br>264.19 (1.17)<br>1870 (1.07)  |
| <b>ACN</b>                   | 400/450                       |             | 12.3 (0.2)<br>1400 (0.8)                     |
|                              | 400/600                       |             | 12.3 (0.3)<br>1400 (0.7)                     |
| <b>TFE</b>                   | 400/450                       |             | 1.0(0.42)<br>12.2(0.36)<br>212.7(0.22)       |
|                              | 400/600                       |             | 3.24(0.25)<br>20.50(0.59)<br>159.24(0.16)    |



**(c) salophen<sup>2-</sup>**

| <b>Solvent</b>  | $\lambda_{ex} / \lambda_{em}$ | <b>(nm)</b> | <b><math>\tau</math> (ns)<sup>a</sup></b>     |
|-----------------|-------------------------------|-------------|-----------------------------------------------|
| <b>EtOH</b>     | 400/500                       |             | 1.4                                           |
| <b>Glycerol</b> | 400/500                       |             | 1.4                                           |
| <b>ACN</b>      | 400/490                       |             | 3.2                                           |
|                 | $\lambda_{ex} / \lambda_{em}$ | <b>(nm)</b> | <b><math>\tau</math> (ns)<sup>a</sup></b>     |
| <b>Glycerol</b> | 400/450                       |             | 0.3 (0.6)<br>800 (0.3)                        |
|                 | 400/600                       |             | 0.4(-0.2)<br>1450 (1.2)                       |
|                 | $\lambda_{ex} / \lambda_{em}$ | <b>(nm)</b> | <b><math>\tau</math> (ps)<sup>a</sup></b>     |
| <b>EtOH</b>     | 400/450                       |             | 1.22 (0.63)<br>9.21 (0.10)<br>303.14 (0.27)   |
|                 | 400/600                       |             | 23.61 (-0.94)<br>7.95 (0.01)<br>1200 (1.92)   |
| <b>BuOH</b>     | 400/450                       |             | 3.52 (0.35)<br>34.23 (0.43)<br>1118.1 (0.204) |
|                 | 400/600                       |             | 42 (-0.42)<br>1482.2 (1.42)                   |
| <b>TFE</b>      | 400/450                       |             | 6.06(0.32)<br>87.19(0.38)<br>1200(0.28)       |
|                 | 400/600                       |             | 12.8(0.12)<br>218.36(0.42)<br>333.93(0.46)    |

**(d) salbn<sup>2-</sup>**

| <b>Solvent</b>  | $\lambda_{ex} / \lambda_{em}$ | <b>(nm)</b> | <b><math>\tau</math> (ns)<sup>a</sup></b> |
|-----------------|-------------------------------|-------------|-------------------------------------------|
| <b>EtOH</b>     | 400/500                       |             | 1.8                                       |
| <b>Glycerol</b> | 400/500                       |             | 2.1                                       |
| <b>ACN</b>      | 400/490                       |             | 3.8                                       |

|                 | $\lambda_{ex} / \lambda_{em}$ (nm) | $\tau$ (ns) <sup>a</sup> |
|-----------------|------------------------------------|--------------------------|
| <b>Glycerol</b> | 400/450                            | 0.4 (0.4)                |
|                 |                                    | 1.7 (0.6)                |
|                 | 400/600                            | 0.6 (-0.3)               |
|                 |                                    | 2340 (1.3)               |
|                 | $\lambda_{ex} / \lambda_{em}$ (nm) | $\tau$ (ps) <sup>a</sup> |
| <b>EtOH</b>     | 400/450                            | 3.5 (0.62)               |
|                 |                                    | 15.4 (0.23)              |
|                 |                                    | 730 (0.15)               |
|                 | 400/600                            | 30.33 (-0.71)            |
| 1200 (1.71)     |                                    |                          |
| <b>BuOH</b>     | 400/450                            | 5.04 (0.35)              |
|                 |                                    | 37.65 (0.46)             |
|                 |                                    | 971.47 (0.17)            |
|                 | 400/600                            | 135 (-1.25)              |
| 264.19 (1.17)   |                                    |                          |
| 1870 (1.07)     |                                    |                          |
| <b>ACN</b>      | 400/450                            | 50 (0.27)                |
|                 |                                    | 1100 (0.73)              |
|                 | 400/600                            | 52 (0.30)                |
|                 |                                    | 1100 (0.70)              |
| <b>TFE</b>      | 400/450                            | 4.55(0.38)               |
|                 |                                    | 15.9(0.43)               |
|                 |                                    | 125.2(0.19)              |
|                 | 400/600                            | 7.57(0.30)               |
| 15.07(0.41)     |                                    |                          |
| 222.82(0.29)    |                                    |                          |

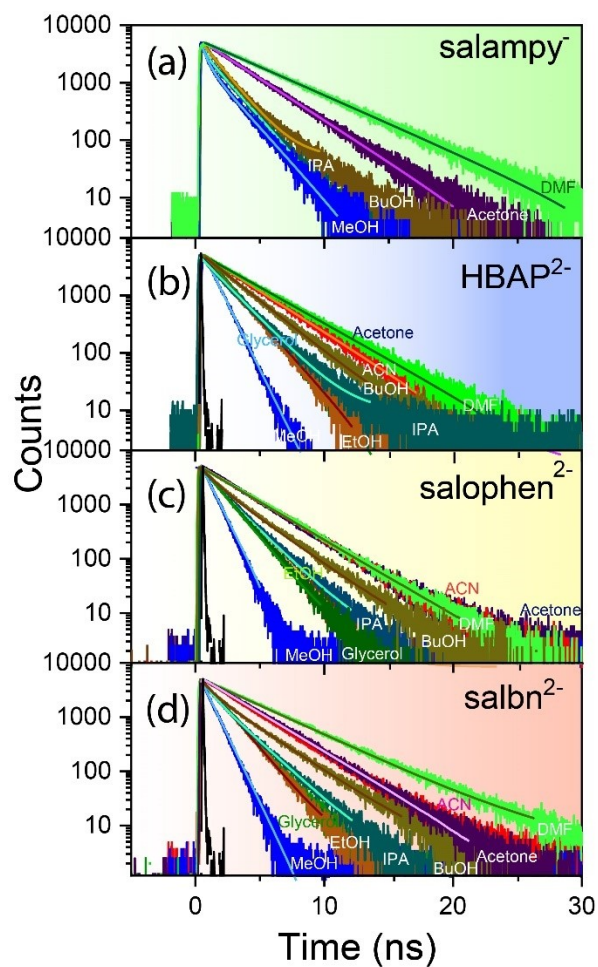

**Figure S4.** Fluorescence decays of (a) salampy<sup>-</sup> (b) HBAP<sup>2-</sup> (c) salophen<sup>2-</sup> (d) salbn<sup>2-</sup> recorded at their corresponding emission maxima with  $\lambda_{ex} = 400 \text{ nm}$ .

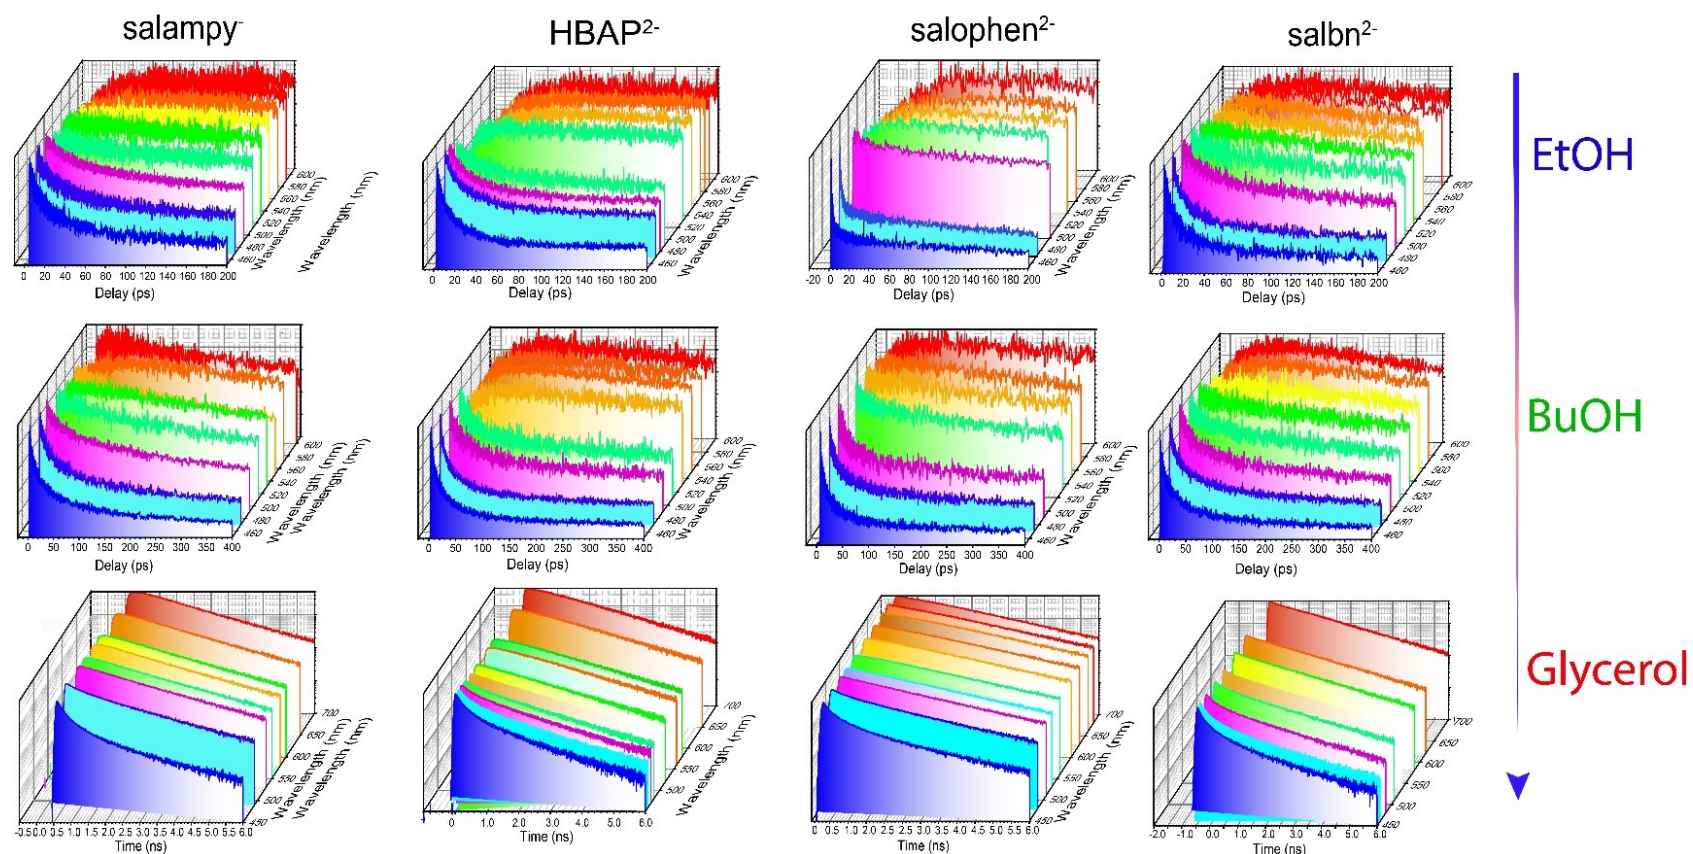

**Figure S5.** Wavelength dependent fluorescence decays of salampy<sup>-</sup>, HBAP, salophen<sup>2-</sup>, and salbn<sup>2-</sup> recorded at their corresponding emission maxima with  $\lambda_{ex} = 400 \text{ nm}$ .

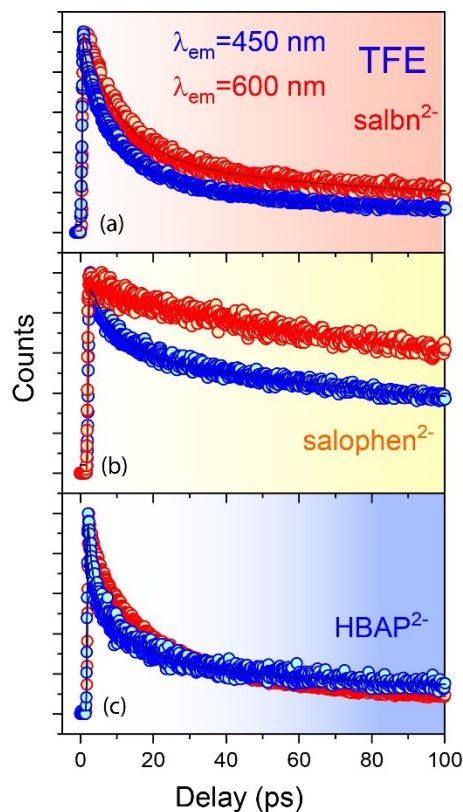

**Figure S6.** Fluorescence decays of (a) salbn<sup>2-</sup> (b) salophen<sup>2-</sup> (c) HBAP<sup>2-</sup> in TFE

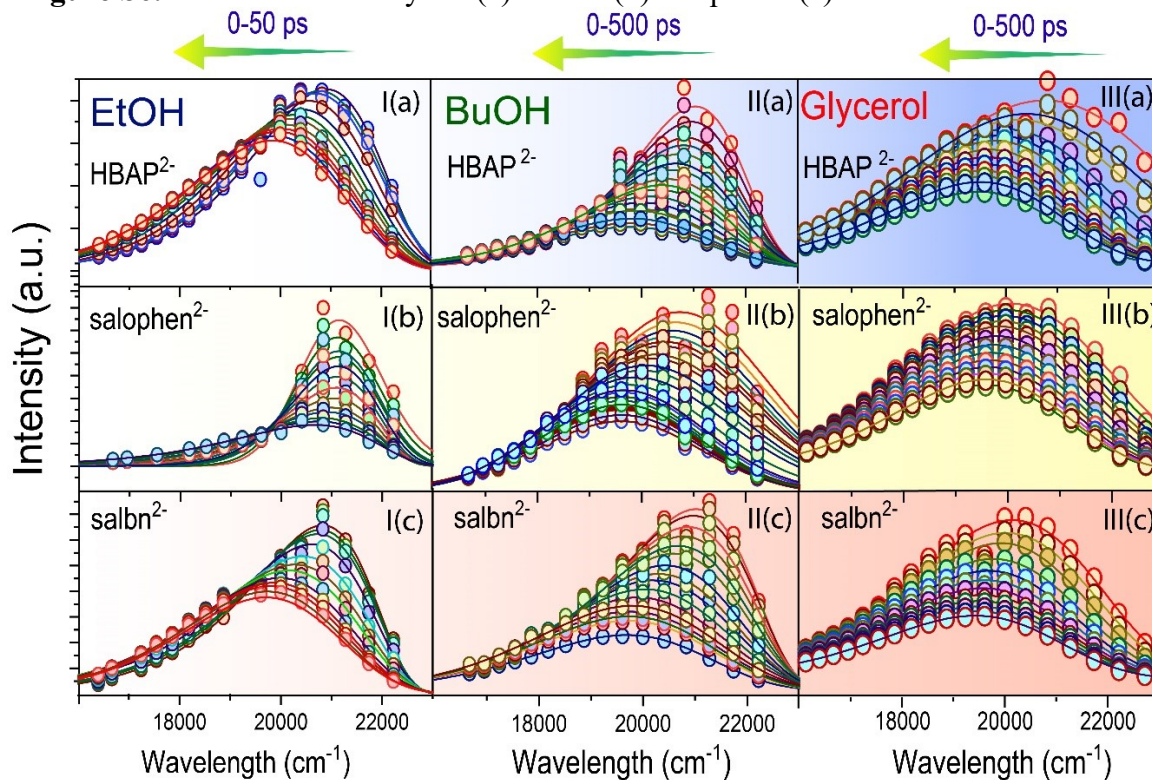

**Figure S7.** Time Resolved Emission Spectra of (a) HBAP<sup>2-</sup> (b) salophen<sup>2-</sup> (c) salbn<sup>2-</sup> in (I) EtOH (II) BuOH and (III) Glycerol

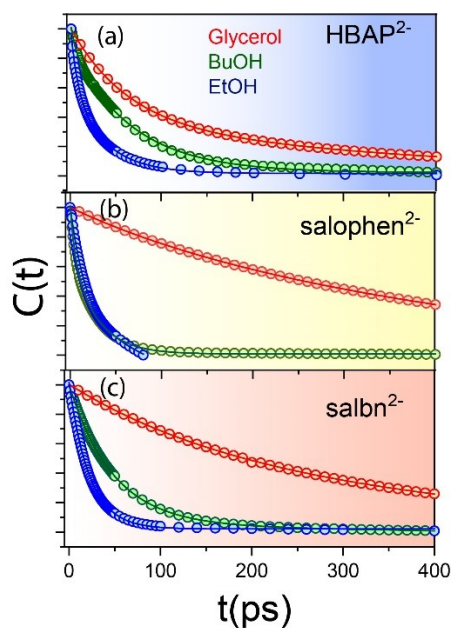

**Figure S8.** Apparent solvent correlation function  $[\tilde{\nu}(t) - \tilde{\nu}(\infty)]$  of (a) HBAP<sup>2-</sup> (b) salophen<sup>2-</sup> (c) salbn<sup>2-</sup>

| <b>Table ST3.</b> Decay parameters of $[\tilde{\nu}(t) - \tilde{\nu}(\infty)]$ vs $t(\text{ps})$ |          |                     |       |                     |       |
|--------------------------------------------------------------------------------------------------|----------|---------------------|-------|---------------------|-------|
|                                                                                                  | Solvent  | $\tau_1(\text{ps})$ | $a_1$ | $\tau_2(\text{ps})$ | $a_2$ |
| <b>salampy<sup>-</sup></b>                                                                       | EtOH     | 14.8                | 0.4   | 79.8                | 0.6   |
|                                                                                                  | BuOH     | 15.3                | 0.4   | 137.2               | 0.6   |
|                                                                                                  | Glycerol | 103                 | 0.3   | 680                 | 0.7   |
| <b>HBAP<sup>2-</sup></b>                                                                         | EtOH     | 7.5                 | 0.3   | 36.1                | 0.7   |
|                                                                                                  | BuOH     | 16.8                | 0.1   | 66.5                | 0.8   |
|                                                                                                  | Glycerol | 62                  | 0.5   | 510.0               | 0.4   |
| <b>salophen<sup>2-</sup></b>                                                                     | EtOH     | 5                   | 0.3   | 28.0                | 0.7   |
|                                                                                                  | BuOH     | 4.8                 | 0.3   | 37.6                | 0.7   |
|                                                                                                  | Glycerol | 148.6               | 0.2   | 639.6               | 0.8   |
| <b>salbn<sup>2-</sup></b>                                                                        | EtOH     | 22.3                | 0.5   | 55.3                | 0.5   |
|                                                                                                  | BuOH     | 31.6                | 0.3   | 70.3                | 0.7   |
|                                                                                                  | Glycerol | 165                 | 0.2   | 650.1               | 0.8   |

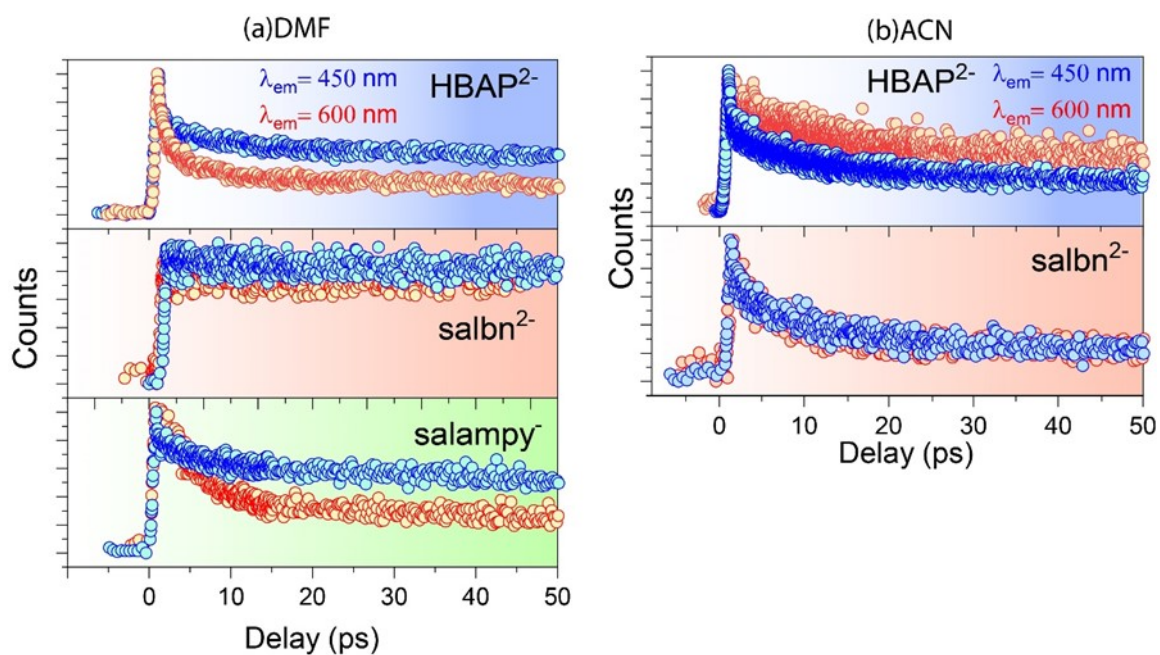

**Figure S9.** Wavelength dependent fluorescence decays of salampy<sup>-</sup>, salbn<sup>2-</sup>, HBAP<sup>2-</sup> in (a) DMF and (b) ACN

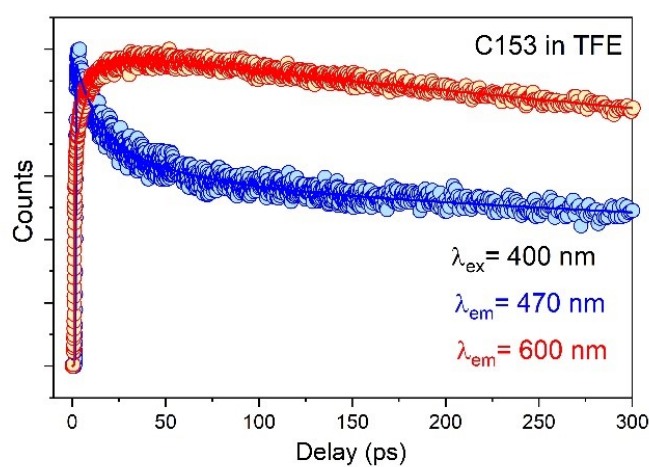

**Figure S10.** Fluorescence decays of C153 in TFE recorded at  $\lambda_{em} = 470 \text{ nm}$  and  $600 \text{ nm}$  with  $\lambda_{ex} = 400 \text{ nm}$

**Table ST4.** Temporal parameters of C153 in 2,2,2-Trifluoroethanol (TFE)

| Wavelength (ex/em) nm | $\tau_1(\text{ps})$ | $a_1$ | $\tau_2(\text{ps})$ | $a_2$ | $\tau_3(\text{ps})$ | $a_3$ |
|-----------------------|---------------------|-------|---------------------|-------|---------------------|-------|
| 400/470               | 10.84               | 0.21  | 44.7                | 0.18  | 1594.3              | 0.61  |
| 400/600               | 10.0                | -0.82 | 13.5                | 0.36  | 1610.7              | 1.45  |

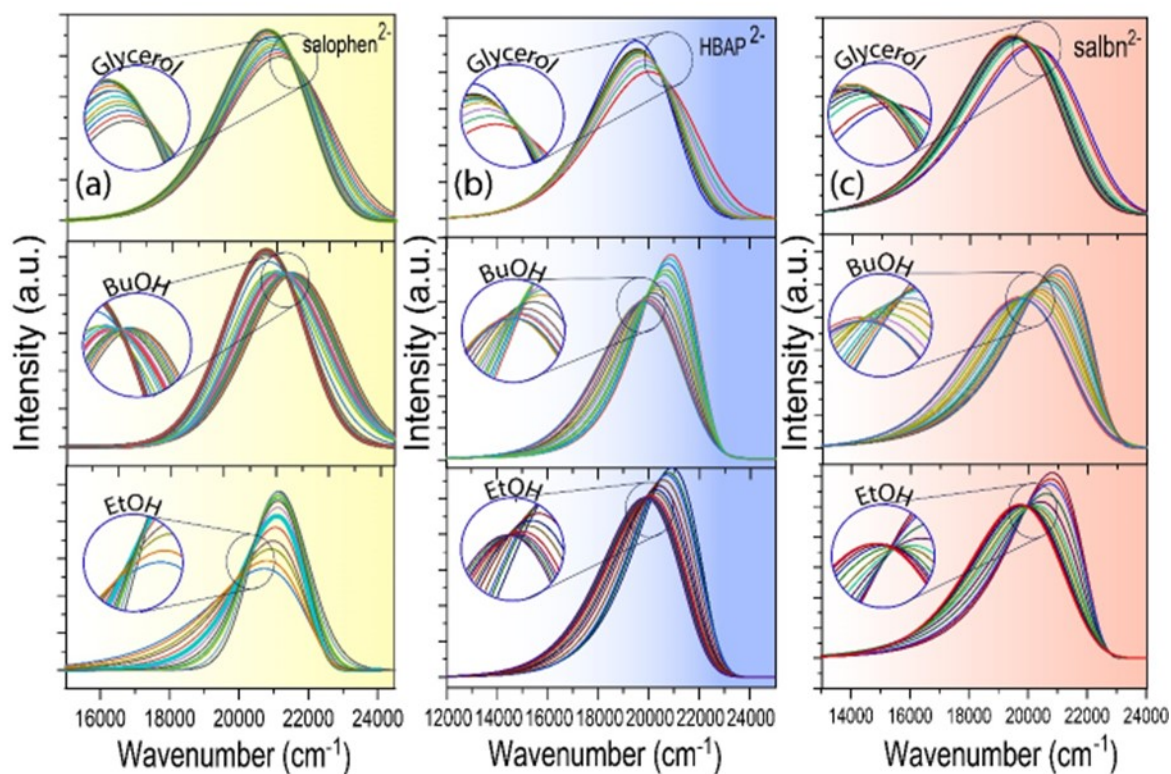

**Figure S11.** Time Resolved Area Normalized Emission Spectrum (TRANES) of (a) salophen<sup>2-</sup> (b) HBAP<sup>2-</sup> (c) salbn<sup>2-</sup> in EtOH, BuOH and Glycerol (inset shows zoomed in view of the diffused isoemissive point)

**Table ST5.** Parameters of different solvents

| Solvent  | $\Delta f$ | $E_T(30)$ | Viscosity ( $\eta$ )<br>cP | Hydrogen bond donating<br>ability ( $\alpha$ ) |
|----------|------------|-----------|----------------------------|------------------------------------------------|
| Glycerol | 0.265      | 57        | 934                        | 1.13                                           |
| ACN      | 0.305      | 45.6      | 0.37                       | 0.19                                           |
| MeOH     | 0.308      | 55.5      | 0.54                       | 0.98                                           |
| Acetone  | 0.284      | 42.2      | 0.31                       | 0.08                                           |
| DMF      | 0.272      | 43.8      | 0.79                       | 0.00                                           |
| EtOH     | 0.288      | 51.9      | 1.07                       | 0.86                                           |
| IPA      | 0.272      | 48.6      | 2.04                       | 0.76                                           |
| BuOH     | 0.239      | 50.2      | 2.54                       | 0.84                                           |
| TFE      | 0.57       | 59.8      | 0.90                       | 1.51                                           |



**Table ST6.** Time Dependent Fluorescent Stokes Shift of the anions in polar protic solvents

| <b>Sample</b>                | <b>Solvent</b> | $\tilde{\nu}(t)$ (cm <sup>-1</sup> ) | $\tilde{\nu}(\infty)$ (cm <sup>-1</sup> ) | $[\tilde{\nu}(t) - \tilde{\nu}(\infty)]$ (cm <sup>-1</sup> ) |
|------------------------------|----------------|--------------------------------------|-------------------------------------------|--------------------------------------------------------------|
| <b>salampy<sup>-</sup></b>   | EtOH           | 20850                                | 19850                                     | 1000                                                         |
|                              | BuOH           | 21600                                | 20050                                     | 1550                                                         |
|                              | Glycerol       | 20760                                | 19600                                     | 1160                                                         |
| <b>HBAP<sup>2-</sup></b>     | EtOH           | 20900                                | 20000                                     | 900                                                          |
|                              | BuOH           | 21000                                | 19900                                     | 1100                                                         |
|                              | Glycerol       | 20850                                | 19600                                     | 1250                                                         |
| <b>salophen<sup>2-</sup></b> | EtOH           | 21200                                | 20500                                     | 700                                                          |
|                              | BuOH           | 20801                                | 19700                                     | 1100                                                         |
|                              | Glycerol       | 20200                                | 19600                                     | 600                                                          |
| <b>salbn<sup>2-</sup></b>    | EtOH           | 20850                                | 19800                                     | 1050                                                         |
|                              | BuOH           | 21100                                | 19900                                     | 1200                                                         |
|                              | Glycerol       | 20300                                | 19550                                     | 750                                                          |

**Table ST7.** Optimized coordinates of Ground State and excited states of salampy

| <b>Ground State</b>  |          |          |          |
|----------------------|----------|----------|----------|
| <b>Atom</b>          | <b>x</b> | <b>y</b> | <b>z</b> |
| N                    | -0.2018  | 0.86143  | 0.19426  |
| N                    | -3.78807 | 0.5568   | -0.49995 |
| C                    | 2.7883   | 0.60937  | -0.36864 |
| C                    | 2.00622  | 1.82467  | -0.27968 |
| C                    | -2.45414 | 0.37257  | -0.44797 |
| C                    | -1.57817 | 1.18618  | 0.45357  |
| H                    | -1.8431  | 2.25247  | 0.33867  |
| H                    | -1.84107 | 0.91821  | 1.48897  |
| C                    | 4.74972  | 2.04039  | -0.81091 |
| H                    | 5.81594  | 2.12068  | -1.01782 |
| C                    | 4.19299  | 0.79988  | -0.64403 |
| H                    | 4.79071  | -0.10376 | -0.71722 |
| C                    | -2.04996 | -0.6309  | -1.30029 |
| C                    | -4.10475 | -1.19392 | -2.15923 |
| H                    | -4.78648 | -1.75458 | -2.78947 |
| C                    | 3.97301  | 3.21316  | -0.72143 |
| H                    | 4.42132  | 4.19261  | -0.8544  |
| C                    | 0.58929  | 1.84982  | -0.0055  |
| H                    | 0.17431  | 2.8762   | 0.03097  |
| C                    | -2.72889 | -1.34388 | -2.0662  |
| C                    | -4.56301 | -0.17874 | -1.30497 |
| H                    | -5.62424 | 0.05573  | -1.27145 |
| C                    | 2.6287   | 3.07517  | -0.45941 |
| H                    | 2.00496  | 3.96592  | -0.38401 |
| O                    | 2.29635  | -0.54675 | -0.2194  |
| C                    | 4.34497  | -2.54975 | 1.1904   |
| H                    | 3.49215  | -2.97032 | 1.75307  |
| H                    | 4.54231  | -1.55865 | 1.63201  |
| O                    | 4.07355  | -2.46006 | -0.17688 |
| H                    | 3.35391  | -1.76603 | -0.27894 |
| C                    | -4.73334 | 2.43131  | 2.32989  |
| H                    | -3.86389 | 1.85291  | 2.68101  |
| H                    | -5.61197 | 1.77224  | 2.4371   |
| O                    | -4.56697 | 2.85973  | 1.00213  |
| H                    | -4.37471 | 2.07369  | 0.4507   |
| C                    | -4.91207 | 3.65454  | 3.20815  |
| H                    | -5.78192 | 4.23005  | 2.87986  |
| H                    | -5.05352 | 3.37229  | 4.25576  |
| H                    | -4.03333 | 4.3002   | 3.13492  |
| C                    | 5.55903  | -3.44063 | 1.39395  |
| H                    | 5.80284  | -3.55325 | 2.456    |
| H                    | 5.37202  | -4.43259 | 0.97174  |
| H                    | 6.42625  | -3.01739 | 0.87867  |
| <b>Excited State</b> |          |          |          |
| N                    | -0.8403  | -0.59463 | -0.27617 |
| N                    | -3.37919 | 1.12486  | -0.74681 |

|   |          |          |          |
|---|----------|----------|----------|
| C | 2.21376  | 0.03532  | 0.14914  |
| C | 1.00632  | 0.83528  | 0.26776  |
| C | -3.18284 | -0.27604 | -0.88999 |
| C | -2.22902 | -0.97543 | 0.00264  |
| H | -2.45793 | -0.78289 | 1.07047  |
| H | -2.3147  | -2.05249 | -0.16577 |
| C | 3.47683  | 2.07664  | -0.32836 |
| H | 4.40852  | 2.58039  | -0.56454 |
| C | 3.44827  | 0.71779  | -0.17568 |
| H | 4.33369  | 0.09824  | -0.2676  |
| C | -3.95852 | -0.75133 | -1.95338 |
| C | -4.98392 | 1.25303  | -2.60872 |
| H | -5.63788 | 1.8657   | -3.21258 |
| C | 2.29773  | 2.82791  | -0.17254 |
| H | 2.32946  | 3.90515  | -0.28968 |
| C | -0.31348 | 0.20416  | 0.54299  |
| H | -0.82512 | 0.54545  | 1.45318  |
| C | -4.74741 | -0.15686 | -2.70059 |
| C | -4.20803 | 1.77284  | -1.55758 |
| H | -4.27603 | 2.84425  | -1.3639  |
| C | 1.08175  | 2.20385  | 0.12834  |
| H | 0.17051  | 2.78273  | 0.2485   |
| O | 2.203    | -1.20591 | 0.35245  |
| C | 5.09361  | -2.27702 | 1.65079  |
| H | 4.54918  | -3.09031 | 2.15634  |
| H | 4.81802  | -1.34511 | 2.16961  |
| O | 4.76921  | -2.21789 | 0.28315  |
| H | 3.81721  | -1.99867 | 0.21836  |
| C | -2.6674  | 2.91591  | 1.9986   |
| H | -2.03077 | 3.48036  | 2.69363  |
| H | -2.75537 | 1.89673  | 2.4111   |
| O | -2.03656 | 2.91113  | 0.74814  |
| H | -2.49069 | 2.2092   | 0.18009  |
| C | -4.05362 | 3.54819  | 1.94893  |
| H | -4.70088 | 2.9711   | 1.28442  |
| H | -4.51541 | 3.58189  | 2.94258  |
| H | -3.98782 | 4.56873  | 1.56005  |
| C | 6.58643  | -2.5095  | 1.78017  |
| H | 6.88701  | -2.57318 | 2.83022  |
| H | 6.86696  | -3.43959 | 1.27887  |
| H | 7.13887  | -1.69294 | 1.30732  |
